# Supplementary material
Source: publisher figshare collection journal article supplement (https://gsapubs.figshare.com/articles/dataset/_/23739885)
Supplement: Supplementary file 1 [file 2]

Table S1: Svalbox DMDb DOMs and identifiers.

| **Svalbox DOM-ID** | **Authors** | **DOI** | **Locality** | **Land** | **Island** | **Date Archived** |
| --- | --- | --- | --- | --- | --- | --- |
| 2016-0001 | Senger and Betlem (2021) | https://www.doi.org/10.5281/zenodo.6642736 | Tschermakfjellet, Dickson Land | Dickson Land | Spitsbergen | 2021-02-16 |
| 2016-0002 | Senger (2021) | https://www.doi.org/10.5281/zenodo.5565516 | Konusdalen, Nordenskiöld Land | Nordenskiöld Land | Spitsbergen | 2021-10-13 |
| 2016-0003 | Senger, Janocha and Rodes (2021) | https://www.doi.org/10.5281/zenodo.5704202 | Kapp Thordsen to Rotundafjellet, Dickson Land | Dickson Land | Spitsbergen | 2021-11-17 |
| 2016-0004 | Senger, Janocha, Festøy, Betlem and Rodes (2021) | https://www.doi.org/10.5281/zenodo.5718710 | Svenskehuset, Dickson Land | Dickson Land | Spitsbergen | 2021-11-22 |
| 2016-0005 | Janocha, Festøy, Betlem and Rodes (2021) | https://www.doi.org/10.5281/zenodo.5718869 | Norskedalen, Dickson Land | Dickson Land | Spitsbergen | 2021-11-22 |
| 2016-0006 | Senger (2021) | https://www.doi.org/10.5281/zenodo.5720863 | Konusdalen, Nordenskiöld Land | Nordenskiöld Land | Spitsbergen | 2021-11-23 |
| 2016-0007 | Senger and Rodes (2022) | https://www.doi.org/10.5281/zenodo.5926378 | Skansen, Dickson Land | Dickson Land | Spitsbergen | 2022-01-31 |
| 2017-0001 | Larssen, Janocha and Rodes (2021) | https://www.doi.org/10.5281/zenodo.5720142 | Sassendalen, Sabine Land | Sabine Land | Spitsbergen | 2021-11-23 |
| 2017-0002 | Larssen and Betlem (2022) | https://www.doi.org/10.5281/zenodo.6324337 | Esperantodalen, Dickson Land | Dickson Land | Spitsbergen | 2022-03-03 |
| 2017-0003 | Larssen and Betlem (2022) | https://www.doi.org/10.5281/zenodo.6325058 | Esperantodalen, Dickson Land | Dickson Land | Spitsbergen | 2022-03-03 |
| 2017-0004 | Senger and Betlem (2022) | https://www.doi.org/10.5281/zenodo.6325155 | Skansen, Dickson Land | Dickson Land | Spitsbergen | 2022-03-03 |
| 2018-0001 | Betlem, Lord, Mosociova and Rodes (2021) | https://www.doi.org/10.5281/zenodo.5702296 | Adventelva, Nordenskiöld Land | Nordenskiöld Land | Spitsbergen | 2021-11-15 |
| 2018-0002 | Schaaf and Janocha (2021) | https://www.doi.org/10.5281/zenodo.5702391 | Sarsøyra, Oscar II Land | Oscar II Land | Spitsbergen | 2021-11-15 |
| 2018-0003 | Schaaf and Janocha (2021) | https://www.doi.org/10.5281/zenodo.5702489 | Sarsøyra, Oscar II Land | Oscar II Land | Spitsbergen | 2021-11-15 |
| 2018-0004 | Schaaf and Janocha (2021) | https://www.doi.org/10.5281/zenodo.5702702 | Sarsøyra, Oscar II Land | Oscar II Land | Spitsbergen | 2021-11-15 |
| 2018-0005 | Senger, Janocha, Betlem and Rodes (2021) | https://www.doi.org/10.5281/zenodo.5703016 | Amphitheatre Todalen, Nordenskiöld Land | Nordenskiöld Land | Spitsbergen | 2021-11-15 |
| 2019-0001 | Janocha and Senger (2021) | https://www.doi.org/10.5281/zenodo.6642723 | Fortet, Bünsow Land | Bünsow Land | Spitsbergen | 2021-02-16 |
| 2019-0002 | Betlem (2021) | https://www.doi.org/10.5281/zenodo.5567483 | Agardhbukta beach, Sabine Land | Sabine Land | Spitsbergen | 2021-10-13 |
| 2019-0003 | Senger, Janocha, Betlem and Rodes (2021) | https://www.doi.org/10.5281/zenodo.5702881 | Vardeborg, Nordenskiöld Land | Nordenskiöld Land | Spitsbergen | 2021-11-15 |
| 2019-0004 | Senger, Janocha and Rodes (2021) | https://www.doi.org/10.5281/zenodo.5703085 | Productustoppen, Nordenskiöld Land | Nordenskiöld Land | Spitsbergen | 2021-11-15 |
| 2019-0005 | Senger, Janocha, Betlem and Rodes (2021) | https://www.doi.org/10.5281/zenodo.5703190 | Munindalen, Dickson Land | Dickson Land | Spitsbergen | 2021-11-15 |
| 2019-0006 | Janocha and Rodes (2021) | https://www.doi.org/10.5281/zenodo.5710524 | Fortet, Bünsow Land | Bünsow Land | Spitsbergen | 2021-11-18 |
| 2019-0008 | Janocha and Rodes (2021) | https://www.doi.org/10.5281/zenodo.5714046 | Fortet South East, Bünsow Land | Bünsow Land | Spitsbergen | 2021-11-19 |
| 2019-0009 | Janocha (2021) | https://www.doi.org/10.5281/zenodo.5718021 | Fortet, Bünsow Land | Bünsow Land | Spitsbergen | 2021-11-22 |
| 2019-0010 | Janocha and Rodes (2021) | https://www.doi.org/10.5281/zenodo.5718145 | Fortet, Bünsow Land | Bünsow Land | Spitsbergen | 2021-11-22 |
| 2019-0011 | Janocha (2021) | https://www.doi.org/10.5281/zenodo.5718247 | Fortet, Bünsow Land | Bünsow Land | Spitsbergen | 2021-11-22 |
| 2019-0012 | Janocha and Rodes (2021) | https://www.doi.org/10.5281/zenodo.5718294 | Fortet, Bünsow Land | Bünsow Land | Spitsbergen | 2021-11-22 |
| 2019-0013 | Betlem and Rodes (2021) | https://www.doi.org/10.5281/zenodo.5718376 | Konusdalen West, Nordenskiöld Land | Nordenskiöld Land | Spitsbergen | 2021-11-22 |
| 2019-0014 | Senger and Rodes (2021) | https://www.doi.org/10.5281/zenodo.5720537 | Høgsnyta, Nordenskiöld Land | Nordenskiöld Land | Spitsbergen | 2021-11-23 |
| 2019-0015 | Janocha and Rodes (2021) | https://www.doi.org/10.5281/zenodo.5720563 | Rudmosepynten, Bünsow Land | Bünsow Land | Spitsbergen | 2021-11-23 |
| 2019-0016 | Senger, Galland, Rabbel, Kuckero and Rodes (2022) | https://www.doi.org/10.5281/zenodo.5925702 | Kolosseum, James I Land | James I Land | Spitsbergen | 2022-01-31 |
| 2019-0017 | Betlem (2022) | https://www.doi.org/10.5281/zenodo.6040179 | Kampesteindalen, Dickson Land | Dickson Land | Spitsbergen | 2022-02-10 |
| 2019-0018 | Betlem (2022) | https://www.doi.org/10.5281/zenodo.6043835 | Kvalhovden, Heer Land | Heer Land | Spitsbergen | 2022-02-11 |
| 2019-0019 | Betlem and Birchall (2022) | https://www.doi.org/10.5281/zenodo.6324275 | Criocerasdalen, Nordenskiöld Land | Nordenskiöld Land | Spitsbergen | 2022-03-02 |
| 2019-0020 | Betlem and Birchall (2022) | https://www.doi.org/10.5281/zenodo.6324323 | Deltaneset, Nordenskiöld Land | Nordenskiöld Land | Spitsbergen | 2022-03-02 |
| 2019-0021 | Betlem (2022) | https://www.doi.org/10.5281/zenodo.6324343 | Kampesteindalen, Dickson Land | Dickson Land | Spitsbergen | 2022-03-03 |
| 2019-0022 | Betlem (2022) | https://www.doi.org/10.5281/zenodo.6324350 | Løvehovden, Dickson Land | Dickson Land | Spitsbergen | 2022-03-03 |
| 2019-0023 | Betlem, Birchall, Ogata, Weert and Senger (2022) | https://www.doi.org/10.5281/zenodo.6542693 | Janusfjellet, Nordenskiöld Land | Nordenskiöld Land | Spitsbergen | 2022-05-12 |
| 2020-0001 | Betlem and Senger (2021) | https://www.doi.org/10.11582/2022.00006 | Festningen, Nordenskiöld Land | Nordenskiöld Land | Spitsbergen | 2021-02-16 |
| 2020-0002 | Betlem (2021) | https://www.doi.org/10.5281/zenodo.5134999 | Janusfjellet, Nordenskiöld Land | Nordenskiöld Land | Spitsbergen | 2021-07-25 |
| 2020-0003 | Betlem and Rodés (2021) | https://www.doi.org/10.5281/zenodo.5137749 | Eistradalen West, Sabine Land | Sabine Land | Spitsbergen | 2021-07-26 |
| 2020-0004 | Betlem (2021) | https://www.doi.org/10.5281/zenodo.5151563 | Hanaskogelva, Nordenskiöld Land | Nordenskiöld Land | Spitsbergen | 2021-08-01 |
| 2020-0005 | Betlem and Rodes (2021) | https://www.doi.org/10.5281/zenodo.5570466 | Peak 627, Nordenskiöld Land | Nordenskiöld Land | Spitsbergen | 2021-10-14 |
| 2020-0006 | Betlem, Lord, Mosociova and Rodes (2021) | https://www.doi.org/10.5281/zenodo.5596196 | Hyperittfossen, Nordenskiöld Land | Nordenskiöld Land | Spitsbergen | 2021-10-25 |
| 2020-0007 | Janocha, Lord, Rodes and Betlem (2021) | https://www.doi.org/10.5281/zenodo.5600370 | Varmlandsryggen, Oscar II Land | Oscar II Land | Spitsbergen | 2021-10-26 |
| 2020-0008 | Betlem, Lord, Mosociova and Rodes (2021) | https://www.doi.org/10.5281/zenodo.5608131 | Helvetiadalen, Nordenskiöld Land | Nordenskiöld Land | Spitsbergen | 2021-10-28 |
| 2020-0009 | Lord, Janocha, Rodes and Betlem (2021) | https://www.doi.org/10.5281/zenodo.5618090 | Sveasletta, Oscar II Land | Oscar II Land | Spitsbergen | 2021-10-29 |
| 2020-0010 | Lord, Janocha, Rodes and Betlem (2021) | https://www.doi.org/10.5281/zenodo.5618710 | Tufsodden, Oscar II Land | Oscar II Land | Spitsbergen | 2021-10-29 |
| 2020-0011 | Lord, Janocha, Rodes and Betlem (2021) | https://www.doi.org/10.5281/zenodo.5627343 | Sveasletta, Oscar II Land | Oscar II Land | Spitsbergen | 2021-10-30 |
| 2020-0012 | Lord, Janocha, Rodes and Betlem (2021) | https://www.doi.org/10.5281/zenodo.5636017 | Ramfjellet, Oscar II Land | Oscar II Land | Spitsbergen | 2021-11-01 |
| 2020-0013 | Lord, Janocha, Rodes and Betlem (2021) | https://www.doi.org/10.5281/zenodo.5638645 | Bertilryggen, Oscar II Land | Oscar II Land | Spitsbergen | 2021-11-02 |
| 2020-0014 | Lord, Janocha, Rodes and Betlem (2021) | https://www.doi.org/10.5281/zenodo.5681288 | Selmaneset East, Oscar II Land | Oscar II Land | Spitsbergen | 2021-11-12 |
| 2020-0015 | Lord, Janocha, Rodes and Betlem (2021) | https://www.doi.org/10.5281/zenodo.5700918 | Lagmannstoppen East, Oscar II Land | Oscar II Land | Spitsbergen | 2021-11-14 |
| 2020-0016 | Lord, Janocha, Rodes and Betlem (2021) | https://www.doi.org/10.5281/zenodo.5700956 | Kvaevefjellet, Oscar II Land | Oscar II Land | Spitsbergen | 2021-11-14 |
| 2020-0017 | Lord, Janocha, Rodes and Betlem (2021) | https://www.doi.org/10.5281/zenodo.5702124 | Gully North of Labben, Oscar II Land | Oscar II Land | Spitsbergen | 2021-11-15 |
| 2020-0018 | Betlem and Rodes (2021) | https://www.doi.org/10.5281/zenodo.5702643 | Helvetiadalen B, Nordenskiöld Land | Nordenskiöld Land | Spitsbergen | 2021-11-15 |
| 2020-0019 | Betlem and Rodes (2021) | https://www.doi.org/10.5281/zenodo.5702768 | Friedrichfjellet, Sabine Land | Sabine Land | Spitsbergen | 2021-11-15 |
| 2020-0020 | Lord, Janocha, Rodes and Betlem (2021) | https://www.doi.org/10.5281/zenodo.5720230 | Vegardfjellet, Oscar II Land | Oscar II Land | Spitsbergen | 2021-11-23 |
| 2020-0021 | Betlem, Birchall, Mosočiová, Gevers and Rodes (2022) | https://www.doi.org/10.5281/zenodo.5930644 | Fjordnibba, Sabine Land | Sabine Land | Spitsbergen | 2022-01-31 |
| 2020-0022 | Betlem, Birchall, Mosočiová, Gevers and Rodes (2022) | https://www.doi.org/10.5281/zenodo.5948289 | Ultunafjella, Bünsow Land | Bünsow Land | Spitsbergen | 2022-02-02 |
| 2020-0023 | Betlem, Birchall, Mosočiová, Gevers and Rodes (2022) | https://www.doi.org/10.5281/zenodo.5955993 | Kapp Schoultz, Sabine Land | Sabine Land | Spitsbergen | 2022-02-03 |
| 2020-0024 | Betlem, Birchall, Mosočiová and Gevers (2022) | https://www.doi.org/10.5281/zenodo.6027608 | Gerardfjella, Bünsow Land | Bünsow Land | Spitsbergen | 2022-02-09 |
| 2020-0025 | Sartell, Betlem, Senger, Gevers, Mosočiová and Rodes (2022) | https://www.doi.org/10.5281/zenodo.6163429 | Bertilryggen, James I Land | James I Land | Spitsbergen | 2022-02-19 |
| 2020-0026 | Sartell, Betlem, Senger, Gevers, Mosočiová and Rodes (2022) | https://www.doi.org/10.5281/zenodo.6170438 | Kapitol, James I Land | James I Land | Spitsbergen | 2022-02-19 |
| 2020-0027 | Sartell, Betlem, Senger, Gevers, Mosočiová and Rodes (2022) | https://www.doi.org/10.5281/zenodo.6170665 | Meyerfjellet, James I Land | James I Land | Spitsbergen | 2022-02-19 |
| 2020-0028 | Sartell, Betlem, Senger, Gevers, Mosočiová and Rodes (2022) | https://www.doi.org/10.5281/zenodo.6171332 | Stjerthøgda, James I Land | James I Land | Spitsbergen | 2022-02-19 |
| 2020-0029 | Bøgh, Schytt Mannerfelt, Hodson, Kleber and Rodes (2022) | https://www.doi.org/10.5281/zenodo.6312322 | Brogniartfjellet, Nathorst Land | Nathorst Land | Spitsbergen | 2022-02-28 |
| 2020-0030 | Bøgh, Schytt Mannerfelt, Hodson, Kleber and Rodes (2022) | https://www.doi.org/10.5281/zenodo.6312532 | Hyrnestabben, Nathorst Land | Nathorst Land | Spitsbergen | 2022-02-28 |
| 2020-0031 | Bøgh, Schytt Mannerfelt, Hodson, Kleber and Rodes (2022) | https://www.doi.org/10.5281/zenodo.6312780 | Høgsnyta, Nordenskiöld Land | Nordenskiöld Land | Spitsbergen | 2022-03-01 |
| 2020-0032 | Dahlin, Senger, Smyrak-Sikora and Olaussen (2022) | https://www.doi.org/10.5281/zenodo.6320818 | Burgerbukta, Torell Land | Torell Land | Spitsbergen | 2022-03-01 |
| 2020-0033 | Bøgh, Schytt Mannerfelt, Hodson, Kleber and Rodes (2022) | https://www.doi.org/10.5281/zenodo.6323175 | Litledalsfjellet, Nordenskiöld Land | Nordenskiöld Land | Spitsbergen | 2022-03-02 |
| 2020-0034 | Bøgh, Schytt Mannerfelt, Hodson, Kleber and Rodes (2022) | https://www.doi.org/10.5281/zenodo.6323702 | Lundgrenfjellet, Nordenskiöld Land | Nordenskiöld Land | Spitsbergen | 2022-03-02 |
| 2020-0035 | Bøgh, Schytt Mannerfelt, Hodson, Kleber and Rodes (2022) | https://www.doi.org/10.5281/zenodo.6324266 | Birketvedttoppen, Nathorst Land | Nathorst Land | Spitsbergen | 2022-03-02 |
| 2020-0036 | Bøgh, Schytt Mannerfelt, Hodson, Kleber and Rodes (2022) | https://www.doi.org/10.5281/zenodo.6335387 | Aspelintoppen, Nathorst Land | Nathorst Land | Spitsbergen | 2022-03-07 |
| 2020-0037 | Bøgh, Schytt Mannerfelt, Hodson, Kleber and Rodes (2022) | https://www.doi.org/10.5281/zenodo.6335693 | Mefjellet, Nordenskiöld Land | Nordenskiöld Land | Spitsbergen | 2022-03-07 |
| 2020-0038 | Bøgh, Schytt Mannerfelt, Hodson, Kleber and Rodes (2022) | https://www.doi.org/10.5281/zenodo.6346943 | Ringdalsfjellet, Nordenskiöld Land | Nordenskiöld Land | Spitsbergen | 2022-03-11 |
| 2020-0039 | Betlem (2022) | https://www.doi.org/10.11582/2022.00027 | Konusdalen West, Nordenskiöld Land | Nordenskiöld Land | Spitsbergen | 2022-04-13 |
| 2020-0040 | Birchall, Betlem, Mosočiová and Gevers (2022) | https://www.doi.org/10.5281/zenodo.6559233 | Criocerasdalen, Nordenskiöld Land | Nordenskiöld Land | Spitsbergen | 2022-05-19 |
| 2020-0041 | Dahlin, Senger, Smyrak-Sikora and Olaussen (2022) | https://www.doi.org/10.5281/zenodo.7273646 | Treskelodden, Torell Land | Torell Land | Spitsbergen | 2022-11-02 |
| 2021-0001 | Betlem, Rodes, Horota and van Hazendonk (2022) | https://www.doi.org/10.5281/zenodo.5898636 | Annaberget, Nathorst Land | Nathorst Land | Spitsbergen | 2022-01-24 |
| 2021-0002 | Betlem, Rodes, Horota and van Hazendonk (2022) | https://www.doi.org/10.5281/zenodo.5905887 | Akseløya, Akseløya | Akseløya | Other | 2022-01-26 |
| 2021-0003 | Betlem, Rodes, Horota and van Hazendonk (2022) | https://www.doi.org/10.5281/zenodo.5910420 | Beckeaksla, Wedel Jarlsberg Land | Wedel Jarlsberg Land | Spitsbergen | 2022-01-27 |
| 2021-0004 | Betlem, Rodes, Horota and van Hazendonk (2022) | https://www.doi.org/10.5281/zenodo.5911383 | Bergmanfjellet, Nathorst Land | Nathorst Land | Spitsbergen | 2022-01-27 |
| 2021-0005 | Betlem, Rodes, Horota and van Hazendonk (2022) | https://www.doi.org/10.5281/zenodo.5913605 | Brogniartfjella, Nathorst Land | Nathorst Land | Spitsbergen | 2022-01-28 |
| 2021-0006 | Betlem, Rodes, Horota and van Hazendonk (2022) | https://www.doi.org/10.5281/zenodo.5914411 | Bravaisberget, Nathorst Land | Nathorst Land | Spitsbergen | 2022-01-28 |
| 2021-0007 | van Winden, Rodes, Betlem and Smyrak-Sikora (2022) | https://www.doi.org/10.5281/zenodo.5925263 | Brattlidalen, Nordenskiöld Land | Nordenskiöld Land | Spitsbergen | 2022-01-31 |
| 2021-0008 | Betlem, Rodes, Horota and van Hazendonk (2022) | https://www.doi.org/10.5281/zenodo.5929356 | Cronstedtkollen, Nathorst Land | Nathorst Land | Spitsbergen | 2022-01-31 |
| 2021-0009 | Betlem, Rodes, Horota and van Hazendonk (2022) | https://www.doi.org/10.5281/zenodo.5931665 | Firkanten, Nathorst Land | Nathorst Land | Spitsbergen | 2022-01-31 |
| 2021-0010 | Betlem, Rodes, Horota and van Hazendonk (2022) | https://www.doi.org/10.5281/zenodo.5939487 | Observatoriefjellet, Wedel Jarlsberg Land | Wedel Jarlsberg Land | Spitsbergen | 2022-02-01 |
| 2021-0011 | Betlem, Rodes, Horota and van Hazendonk (2022) | https://www.doi.org/10.5281/zenodo.5947139 | Storvola, Nathorst Land | Nathorst Land | Spitsbergen | 2022-02-02 |
| 2021-0012 | Betlem, Rodes, Horota and van Hazendonk (2022) | https://www.doi.org/10.5281/zenodo.5948644 | Pallen, Nathorst Land | Nathorst Land | Spitsbergen | 2022-02-02 |
| 2021-0013 | Betlem, Rodes, Horota and van Hazendonk (2022) | https://www.doi.org/10.5281/zenodo.5948792 | Réaumurfjellet, Nathorst Land | Nathorst Land | Spitsbergen | 2022-02-02 |
| 2021-0014 | Betlem, Rodes, Horota and van Hazendonk (2022) | https://www.doi.org/10.5281/zenodo.5948895 | Kolfjellet, Nordenskiöld Land | Nordenskiöld Land | Spitsbergen | 2022-02-02 |
| 2021-0015 | Betlem, Rodes, Horota and van Hazendonk (2022) | https://www.doi.org/10.5281/zenodo.5969735 | Ullaberget, Nathorst Land | Nathorst Land | Spitsbergen | 2022-02-04 |
| 2021-0016 | Betlem, Rodes, Horota and van Hazendonk (2022) | https://www.doi.org/10.5281/zenodo.5970919 | Kapp Morton, Nordenskiöld Land | Nordenskiöld Land | Spitsbergen | 2022-02-04 |
| 2021-0017 | van Winden, Betlem, Rodes and Smyrak-Sikora (2022) | https://www.doi.org/10.5281/zenodo.6038770 | Storgjelet, Sabine Land | Sabine Land | Spitsbergen | 2022-02-10 |
| 2021-0018 | Betlem, Rodes, Horota and van Hazendonk (2022) | https://www.doi.org/10.5281/zenodo.6040362 | Midterhuken, Nathorst Land | Nathorst Land | Spitsbergen | 2022-02-11 |
| 2021-0019 | van Winden, Rodes and Betlem (2022) | https://www.doi.org/10.5281/zenodo.6167307 | Brattdalen, Nordenskiöld Land | Nordenskiöld Land | Spitsbergen | 2022-02-19 |
| 2021-0020 | van Winden, Betlem, Rodes and Smyrak-Sikora (2022) | https://www.doi.org/10.5281/zenodo.6167694 | Brentskaret, Nordenskiöld Land | Nordenskiöld Land | Spitsbergen | 2022-02-19 |
| 2021-0021 | van Winden, Rodes and Betlem (2022) | https://www.doi.org/10.5281/zenodo.6170081 | Grønfjordbreane, Nordenskiöld Land | Nordenskiöld Land | Spitsbergen | 2022-02-19 |
| 2021-0022 | van Winden, Rodes and Betlem (2022) | https://www.doi.org/10.5281/zenodo.6206890 | Larvikpynten, Nordenskiöld Land | Nordenskiöld Land | Spitsbergen | 2022-02-21 |
| 2021-0023 | van Winden, Rodes and Betlem (2022) | https://www.doi.org/10.5281/zenodo.6311142 | Haagfjellet, Nordenskiöld Land | Nordenskiöld Land | Spitsbergen | 2022-02-28 |
| 2021-0024 | van Winden, Betlem, Rodes and Smyrak-Sikora (2022) | https://www.doi.org/10.5281/zenodo.6321183 | Juvdalskampen, Nordenskiöld Land | Nordenskiöld Land | Spitsbergen | 2022-03-01 |
| 2021-0025 | Dahlin, Schaaf, Janocha and Johannesen (2022) | https://www.doi.org/10.5281/zenodo.6321229 | Landnørdingsvika, Bjørnøya | Bjørnøya | Bjørnøya | 2022-03-02 |
| 2021-0026 | van Winden, Rodes, Betlem and Smyrak-Sikora (2022) | https://www.doi.org/10.5281/zenodo.6323576 | Løvehovden, Dickson Land | Dickson Land | Spitsbergen | 2022-03-02 |
| 2021-0027 | van Winden, Rodes and Betlem (2022) | https://www.doi.org/10.5281/zenodo.6323734 | Malmberget, Nordenskiöld Land | Nordenskiöld Land | Spitsbergen | 2022-03-02 |
| 2021-0028 | van Winden, Betlem and Rodes (2022) | https://www.doi.org/10.5281/zenodo.6337093 | Muninelva, Dickson Land | Dickson Land | Spitsbergen | 2022-03-08 |
| 2021-0029 | van Winden, Rodes and Betlem (2022) | https://www.doi.org/10.5281/zenodo.6337202 | Medalen, Nordenskiöld Land | Nordenskiöld Land | Spitsbergen | 2022-03-08 |
| 2021-0030 | van Winden, Rodes and Betlem (2022) | https://www.doi.org/10.5281/zenodo.6346367 | Synndalen, Nordenskiöld Land | Nordenskiöld Land | Spitsbergen | 2022-03-11 |
| 2021-0031 | van Winden, Rodes, Betlem and Smyrak-Sikora (2022) | https://www.doi.org/10.5281/zenodo.6346419 | Nøisdalen, Sabine Land | Sabine Land | Spitsbergen | 2022-03-11 |
| 2021-0032 | van Winden, Rodes and Betlem (2022) | https://www.doi.org/10.5281/zenodo.6346549 | Qvigstadfjellet, Nordenskiöld Land | Nordenskiöld Land | Spitsbergen | 2022-03-11 |
| 2021-0033 | van Winden, Rodes and Betlem (2022) | https://www.doi.org/10.5281/zenodo.6397588 | Braganzatoppen, Nordenskiöld Land | Nordenskiöld Land | Spitsbergen | 2022-03-30 |
| 2021-0034 | van Winden, Rodes and Betlem (2022) | https://www.doi.org/10.5281/zenodo.6397710 | Heerfjellstupet, Nordenskiöld Land | Nordenskiöld Land | Spitsbergen | 2022-03-30 |
| 2021-0035 | van Winden, Rodes and Betlem (2022) | https://www.doi.org/10.5281/zenodo.6398833 | Productustoppen, Nordenskiöld Land | Nordenskiöld Land | Spitsbergen | 2022-03-30 |
| 2021-0036 | van Winden, Rodes and Betlem (2022) | https://www.doi.org/10.5281/zenodo.6399112 | Productustoppen, Nordenskiöld Land | Nordenskiöld Land | Spitsbergen | 2022-03-30 |
| 2021-0037 | van Winden, Rodes and Betlem (2022) | https://www.doi.org/10.5281/zenodo.6399223 | Standsteinfjellet, Nordenskiöld Land | Nordenskiöld Land | Spitsbergen | 2022-03-30 |
| 2021-0038 | van Winden, Rodes and Betlem (2022) | https://www.doi.org/10.5281/zenodo.6399275 | Starostinaksla, Nordenskiöld Land | Nordenskiöld Land | Spitsbergen | 2022-03-30 |
| 2021-0039 | van Winden, Rodes and Betlem (2022) | https://www.doi.org/10.5281/zenodo.6399291 | Trodalen, Nordenskiöld Land | Nordenskiöld Land | Spitsbergen | 2022-03-30 |
| 2021-0040 | van Winden, Rodes and Betlem (2022) | https://www.doi.org/10.5281/zenodo.6409854 | Flynibba, Nordenskiöld Land | Nordenskiöld Land | Spitsbergen | 2022-04-03 |
| 2021-0041 | van Winden, Rodes and Betlem (2022) | https://www.doi.org/10.5281/zenodo.6409895 | Seipfjellet, Nordenskiöld Land | Nordenskiöld Land | Spitsbergen | 2022-04-03 |
| 2021-0042 | van Winden, Rodes and Betlem (2022) | https://www.doi.org/10.5281/zenodo.6409929 | Strandlinuten, Nordenskiöld Land | Nordenskiöld Land | Spitsbergen | 2022-04-03 |
| 2021-0043 | van Winden, Rodes and Betlem (2022) | https://www.doi.org/10.5281/zenodo.6409991 | Vøringen, Nordenskiöld Land | Nordenskiöld Land | Spitsbergen | 2022-04-03 |
| 2021-0044 | van Winden, Rodes and Betlem (2022) | https://www.doi.org/10.5281/zenodo.6410016 | Ytterdalselva, Nordenskiöld Land | Nordenskiöld Land | Spitsbergen | 2022-04-03 |
| 2021-0045 | van Winden, Rodes and Betlem (2022) | https://www.doi.org/10.5281/zenodo.6410050 | Griegaksla, Nordenskiöld Land | Nordenskiöld Land | Spitsbergen | 2022-04-03 |
| 2021-0046 | van Winden, Rodes and Betlem (2022) | https://www.doi.org/10.5281/zenodo.6410068 | Ingeborgfjellet, Nordenskiöld Land | Nordenskiöld Land | Spitsbergen | 2022-04-03 |
| 2021-0047 | van Winden, Rodes and Betlem (2022) | https://www.doi.org/10.5281/zenodo.6410126 | Jarndalen, Nordenskiöld Land | Nordenskiöld Land | Spitsbergen | 2022-04-03 |
| 2021-0048 | van Winden, Rodes and Betlem (2022) | https://www.doi.org/10.5281/zenodo.6410151 | Solryggen, Nordenskiöld Land | Nordenskiöld Land | Spitsbergen | 2022-04-03 |
| 2021-0049 | van Winden, Rodes and Betlem (2022) | https://www.doi.org/10.5281/zenodo.6410173 | Solryggen, Nordenskiöld Land | Nordenskiöld Land | Spitsbergen | 2022-04-03 |
| 2021-0050 | van Winden, Rodes and Betlem (2022) | https://www.doi.org/10.5281/zenodo.6410202 | Systemafjellet, Nordenskiöld Land | Nordenskiöld Land | Spitsbergen | 2022-04-03 |
| 2021-0051 | van Winden, Rodes and Betlem (2022) | https://www.doi.org/10.5281/zenodo.6410208 | Systemafjellet, Nordenskiöld Land | Nordenskiöld Land | Spitsbergen | 2022-04-03 |
| 2021-0052 | van Winden, Rodes and Betlem (2022) | https://www.doi.org/10.5281/zenodo.6410214 | Ytterdalssåta, Nordenskiöld Land | Nordenskiöld Land | Spitsbergen | 2022-04-03 |
| 2021-0053 | van Winden, Rodes and Betlem (2022) | https://www.doi.org/10.5281/zenodo.6410227 | Ytterdalssåta, Nordenskiöld Land | Nordenskiöld Land | Spitsbergen | 2022-04-03 |
| 2021-0054 | Dahlin, Janocha and Smyrak-Sikora (2022) | https://www.doi.org/10.5281/zenodo.7271603 | Adriabukta, Torell Land | Torell Land | Spitsbergen | 2022-11-01 |
| 2021-0055 | van Winden, Rodes and Betlem (2022) | https://www.doi.org/10.5281/zenodo.7274260 | Passfjellbreen, Nordenskiöld Land | Nordenskiöld Land | Spitsbergen | 2022-11-02 |
| 2021-0056 | Betlem, Oldfield, Kelly and Lindell (2023) | https://www.doi.org/10.5281/zenodo.7762910 | Konusdalen, Nordenskiöld Land | Nordenskiöld Land | Spitsbergen | 2023-03-22 |
